# Supplementary material
Source: ML conference proceedings conference paper supplement (https://openreview.net/forum?id=XiConLcsqq)
Supplement: supplementary_material [file attachment]

## A NeurIPS Datasets and Benchmark Track Dataset Documentation

### A.1 Links

All items can be found in this collection: <https://hf.co/collections/allenai/reward-bench-65e8dea22eb775e2e7d5dbe2>.

- Core dataset on HuggingFace: <https://hf.co/datasets/allenai/reward-bench>
  - Dataset Croissant metadata: <https://hf.co/datasets/allenai/reward-bench/blob/d61ac5c97d0f2f7eb922da3c0b6bbaf614ae8d02/README.md?code=true#L2>
  - Dataset DOI identifier (10.57967/hf/2457): <https://huggingface.co/datasets/allenai/reward-bench?doi=true>.
  - Reformatted prior test sets: <https://hf.co/datasets/allenai/preference-test-sets>
  - Evaluation results data: <https://huggingface.co/datasets/allenai/reward-bench-results>
  - Script to re-build the dataset from scratch: [https://huggingface.co/datasets/allenai/reward-bench/blob/main/build\\_datasets.ipynb](https://huggingface.co/datasets/allenai/reward-bench/blob/main/build_datasets.ipynb)
  - Dataset license (ODC-by): <https://huggingface.co/datasets/allenai/reward-bench/blob/main/LICENSE.md>. **The authors bear all risks in the case of violation of this dataset license.** In our case, ODC-by is used because most of the dataset is repurposing other data, rather than original generations.
- Codebase: <https://github.com/allenai/reward-bench>
- Leaderboard: <https://hf.co/spaces/allenai/reward-bench>

### A.2 Using this dataset

This dataset can be used with any codebase that can read parquet records. The most popular for doing so, which is used in our codebase on GitHub, is HuggingFace Datasets. To load the dataset minimally with Datasets:

```
# pip install datasets
from datasets import load_dataset
data = load_dataset("allenai/reward-bench", split="filtered")
```

Note that ‘split=raw’ shows the samples before manual verification. A dataset viewer is available in the Leaderboard and natively on HuggingFace’s dataset pages.

**This dataset will be maintained indefinitely. Any changes to the dataset location will automatically be redirected by HuggingFace. Future improvements will be handled as new datasets or splits, e.g. ‘filtered-v2’**

### A.3 Benchmark Reproducibility

To exactly reproduce the results of the benchmark, we include a Dockerfile (<https://github.com/allenai/reward-bench/blob/main/Dockerfile>) and configurations for every model we evaluated ([https://github.com/allenai/reward-bench/blob/main/scripts/configs/eval\\_configs.yaml](https://github.com/allenai/reward-bench/blob/main/scripts/configs/eval_configs.yaml)). All experiments are conducted on NVIDIA A100 GPUs.

We plan to host the dataset indefinitely on HuggingFace.

### A.4 Dataset Card

**Note: this is the dataset is card converted from HuggingFace.**

The RewardBench evaluation dataset evaluates capabilities of reward models over the following categories:

1. **Chat:** Includes the easy chat subsets (alpacaeval-easy, alpacaeval-length, alpacaeval-hard, mt-bench-easy, mt-bench-medium)
2. **Chat Hard:** Includes the hard chat subsets (mt-bench-hard, llmbar-natural, llmbar-adver-neighbor, llmbar-adver-GPTInst, llmbar-adver-GPTOut, llmbar-adver-manual)
3. **Safety:** Includes the safety subsets (refusals-dangerous, refusals-offensive, xstest-should-refuse, xstest-should-respond, do not answer)
4. **Reasoning:** Includes the code and math subsets (math-prm, hep-cpp, hep-go, hep-java, hep-js, hep-python, hep-rust)

The RewardBench leaderboard averages over these subsets and a final category from [prior preference data test sets](#) including Anthropic Helpful, Anthropic HHH in BIG-Bench, Stanford Human Preferences (SHP), and OpenAI’s Learning to Summarize data.

The scoring for RewardBench compares the score of a prompt-chosen pair to a prompt-rejected pair. Success is when the chosen score is higher than rejected.

In order to create a representative, single evaluation score, we perform a limited mixture of averaging across results. For all the subsets detailed below except for Reasoning, we perform per-prompt weighted averaging across all the prompts in the subset to get the section score. For example, in Chat we take a weighted average of the AlpacaEval and MT Bench sets based on the number of prompts. For Reasoning, we increase the weight of the PRM-Math subset so code and math abilities are weighed equally in the final number, rather than increasing the relevance of code. Once all subsets weighted averages are achieved, the final RewardBench score is the average across the subset scores (including Prior Sets).

#### A.4.1 Dataset Details

In order to maintain all the relevant data, the samples in the dataset will have the following items. Note, the dataset is single-turn: \* `prompt (str)`: the instruction given in the various test sets. \* `chosen (str)`: the response from the better model or the better rated prompt. \* `chosen_model (str)`: where applicable \* `rejected (str)`: the response with the lower score or from word model. \* `rejected_model (str)`: where applicable \* `subset (str)`: the subset (e.g. alpacaeval-easy) of the associated prompt as the dataset is all in one split. \* `id (int)`: an incremented id for every prompt in the benchmark.

To select a specific subset use HuggingFace Datasets `.filter` functionality.

```
dataset = dataset.filter(lambda ex: ex["subset"] == "alpacaeval-easy")
```

This can easily be converted to the standard chosen/rejected list of messages format (see [UltraFeedback for an example](#)), for example with our data loading utilities on [GitHub](#).

**Subset Summary** Total number of the prompts is: 2985.

| Subset            | Num. Samples<br>(Pre-filtering,<br>post-filtering) | Description                                                                                                             |
|-------------------|----------------------------------------------------|-------------------------------------------------------------------------------------------------------------------------|
| alpacaeval-easy   | 805, 100                                           | Great model vs poor model;<br>GPT4-Turbo 97.7% v. Alpaca 7b<br>26.46% (data <a href="#">here</a> )                      |
| alpacaeval-length | 805, 95                                            | Good model vs low model, similar<br>length; Llama2chat 70B 92.66% vs<br>Guanaco 13B 52.61% (data <a href="#">here</a> ) |
| alpacaeval-hard   | 805, 95                                            | Great model vs baseline model;<br>Tulu 2 95.0% v. Davinici003<br>50.0% (data <a href="#">here</a> )                     |
| mt-bench-easy     | 28, 28                                             | MT Bench 10s vs 1s (source <a href="#">data</a> )                                                                       |
| mt-bench-medium   | 45, 40                                             | MT Bench 9s vs 2-5s (source <a href="#">data</a> )                                                                      |
| mt-bench-hard     | 45, 37                                             | MT Bench 7-8 vs 5-6 (source <a href="#">data</a> )                                                                      |

| Subset                | Num. Samples<br>(Pre-filtering,<br>post-filtering) | Description                                                                                                   |
|-----------------------|----------------------------------------------------|---------------------------------------------------------------------------------------------------------------|
| refusals-dangerous    | 505, 100                                           | Dangerous rejected response vs polite chosen refusal                                                          |
| refusals-offensive    | 704, 100                                           | Offensive rejected response vs polite chosen refusal                                                          |
| llmbar-natural        | 100                                                | Manually curated instruction pairs (See <a href="#">paper</a> )                                               |
| llmbar-adver-neighbor | 134                                                | Adversarial instruction response vs. off-topic prompt response (See <a href="#">paper</a> )                   |
| llmbar-adver-GPTInst  | 92                                                 | Adversarial instruction response vs. GPT4 generated off-topic prompt response (See <a href="#">paper</a> )    |
| llmbar-adver-GPTOut   | 47                                                 | Adversarial instruction response vs. unhelpful-prompted GPT4 responses (See <a href="#">paper</a> )           |
| llmbar-adver-manual   | 46                                                 | Challenge set manually designed chosen vs. rejected                                                           |
| xstest-should-refuse  | 450, 250                                           | False response dataset (see <a href="#">paper</a> )                                                           |
| xstest-should-respond | 450, 154                                           | False refusal dataset (see <a href="#">paper</a> )                                                            |
| do not answer         | 939, 136                                           | <a href="#">Prompts which responsible LLMs do not answer</a> : Refusals are chosen and responses are rejected |
| hep-cpp               | 164                                                | C++ working code vs. buggy code (See <a href="#">dataset</a> or <a href="#">paper</a> )                       |
| hep-go                | 164                                                | Go working code vs. buggy code                                                                                |
| hep-java              | 164                                                | Java working code vs. buggy code                                                                              |
| hep-js                | 164                                                | Javascript working code vs. buggy code                                                                        |
| hep-python            | 164                                                | Python working code vs. buggy code                                                                            |
| hep-rust              | 164                                                | Rust working code vs. buggy code                                                                              |
| math-prm              | 447                                                | Human references vs. model error (see <a href="#">paper</a> )                                                 |

The length distribution of the subsets with a Llama tokenizer is shown below.

| Subset                | Chosen<br>Mean<br>Tokens | Reject<br>Mean<br>Tokens | Chosen<br>Max<br>Tokens | Reject<br>Max<br>Tokens | Chosen<br>Min<br>Tokens | Reject<br>Min<br>Tokens | Chosen<br>Mean<br>Unique<br>Tokens | Reject<br>Mean<br>Unique<br>Tokens | Chosen<br>Max<br>Unique<br>Tokens | Reject<br>Max<br>Unique<br>Tokens | Chosen<br>Min<br>Unique<br>Tokens | Reject<br>Min<br>Unique<br>Tokens |
|-----------------------|--------------------------|--------------------------|-------------------------|-------------------------|-------------------------|-------------------------|------------------------------------|------------------------------------|-----------------------------------|-----------------------------------|-----------------------------------|-----------------------------------|
|                       |                          |                          |                         |                         |                         |                         |                                    |                                    |                                   |                                   |                                   |                                   |
| alpaca-eval-easy      | 591.26                   | 167.33                   | 1332                    | 1043                    | 40                      | 15                      | 252.91                             | 83.44                              | 630                               | 290                               | 33                                | 12                                |
| alpaca-eval-hard      | 411.684                  | 136.926                  | 1112                    | 711                     | 57                      | 12                      | 172.537                            | 70.9684                            | 359                               | 297                               | 45                                | 8                                 |
| alpaca-eval-length    | 510.589                  | 596.895                  | 1604                    | 2242                    | 55                      | 52                      | 192.442                            | 188.547                            | 434                               | 664                               | 30                                | 38                                |
| donotanswer           | 169.61                   | 320.5                    | 745                     | 735                     | 20                      | 20                      | 103.743                            | 156.941                            | 358                               | 337                               | 18                                | 13                                |
| hep-cpp               | 261.262                  | 259.488                  | 833                     | 835                     | 53                      | 57                      | 99.8537                            | 99.372                             | 201                               | 201                               | 37                                | 40                                |
| hep-go                | 266.22                   | 264.598                  | 732                     | 720                     | 55                      | 57                      | 99.622                             | 99.189                             | 201                               | 201                               | 36                                | 37                                |
| hep-java              | 263.14                   | 260.939                  | 748                     | 733                     | 55                      | 54                      | 102.311                            | 101.927                            | 207                               | 206                               | 39                                | 41                                |
| hep-js                | 251.165                  | 249.695                  | 771                     | 774                     | 53                      | 52                      | 93.2744                            | 92.9268                            | 192                               | 192                               | 37                                | 40                                |
| hep-python            | 211.988                  | 211.146                  | 624                     | 612                     | 53                      | 49                      | 85.6463                            | 85.3049                            | 190                               | 190                               | 36                                | 35                                |
| hep-rust              | 221.256                  | 219.049                  | 988                     | 993                     | 46                      | 49                      | 95.1402                            | 94.8354                            | 192                               | 192                               | 36                                | 36                                |
| l1mbar-adver-GPTInst  | 170.109                  | 377.359                  | 636                     | 959                     | 15                      | 15                      | 92.9457                            | 179.37                             | 287                               | 471                               | 12                                | 13                                |
| l1mbar-adver-GPTOut   | 96.4255                  | 101                      | 393                     | 476                     | 18                      | 20                      | 60.0426                            | 55.0426                            | 241                               | 228                               | 13                                | 14                                |
| l1mbar-adver-manual   | 159.804                  | 264.37                   | 607                     | 737                     | 23                      | 33                      | 91.9565                            | 140.13                             | 273                               | 385                               | 18                                | 24                                |
| l1mbar-adver-neighbor | 70.2239                  | 172.507                  | 603                     | 865                     | 9                       | 13                      | 43.3134                            | 90.9328                            | 250                               | 324                               | 8                                 | 9                                 |
| l1mbar-natural        | 139.42                   | 129.82                   | 907                     | 900                     | 17                      | 18                      | 74.99                              | 70.07                              | 354                               | 352                               | 14                                | 14                                |
| math-prm              | 279.313                  | 488.841                  | 1608                    | 1165                    | 35                      | 77                      | 83.6264                            | 124.582                            | 237                               | 257                               | 23                                | 46                                |
| mt-bench-easy         | 391.821                  | 481.929                  | 778                     | 1126                    | 155                     | 31                      | 169.071                            | 121.321                            | 288                               | 434                               | 74                                | 19                                |
| mt-bench-hard         | 287.784                  | 301.649                  | 573                     | 1176                    | 68                      | 62                      | 133.622                            | 121.676                            | 261                               | 309                               | 50                                | 48                                |
| mt-bench-med          | 351.375                  | 466.025                  | 655                     | 1297                    | 145                     | 52                      | 159.9                              | 140.325                            | 285                               | 495                               | 82                                | 41                                |
| refusals-dangerous    | 208.4                    | 458.61                   | 380                     | 804                     | 87                      | 103                     | 128.53                             | 211                                | 200                               | 365                               | 71                                | 55                                |
| refusals-offensive    | 139.82                   | 298.63                   | 278                     | 1117                    | 75                      | 26                      | 95.98                              | 134.02                             | 170                               | 477                               | 60                                | 19                                |
| xstest-should-refuse  | 129.227                  | 217.019                  | 402                     | 549                     | 18                      | 15                      | 80.5519                            | 116.149                            | 194                               | 245                               | 16                                | 13                                |
| xstest-should-respond | 188.708                  | 107.356                  | 515                     | 465                     | 20                      | 16                      | 103.788                            | 67.328                             | 231                               | 202                               | 15                                | 16                                |

**Filtering Summary** The RewardBench dataset is manually filtered from 5123 source prompts to manually verify the chosen-rejected ranking of prompts.

- The categories of AlpacaEval and MT Bench are manually filtered for every prompt.
- LLMBar, DoNotAnswer, HEP, and Math PRM all contained structured metadata for automatic filtering.
- XSTest is a hybrid of manual confirmation with metadata from the project.
- Refusals are automatically generated as a refusal or response (where refusal is preferred) with manual confirmation.

Substantial filtering details are available in the appendix of the paper. If there are any bugs in the data, please reach out! No PII was collected during the manual annotation.

**License information** Licensing an aggregated dataset is a complex task. We release the RewardBench dataset under [ODC-BY](#) requiring the user to follow the licenses of the subsequent parts. Licensing LLM datasets is an evolving topic. The licenses primarily apply to the prompts and the completions generated by models are often unlicensed. The details for the datasets used in this work vary in the level of the detail on licenses and method of applying them.

| Dataset       | Variants                                     | Data License    |
|---------------|----------------------------------------------|-----------------|
| AlpacaEval    | {Easy, Length, Hard}                         | CC By NC 4.0    |
| MT Bench      | {Easy, Medium, Hard}                         | Apache 2.0      |
| LLMBar        | {Natural, Neighbor, GPTInst, GPTOut, Manual} | MIT License     |
| Do Not Answer |                                              | CC BY NC SA 4.0 |
| XSTest        | {Should Respond, Should Refuse}              | CC By 4.0       |
| HEP           | {CPP, Go, Javascript, Rust, Python, Rust}    | MIT License     |
| PRM           |                                              | MIT License     |
| Math          |                                              |                 |

Within this dataset are prompts created by AI2 (the refusals data, released as MIT for now, see official release soon) with completions from API and open models. More details will come on this soon.

#### A.4.2 Development

**Requirements** Building the dataset requires datasets. Maintaining the script and notebooks requires notebook.

```
pip install datasets notebook nbconvert
```

Convert with:

```
jupyter nbconvert --to script [YOUR_NOTEBOOK].ipynb
```

With no changes to the ipynb, the dataset can be re-built and pushed with the following (PLEASE BE CAREFUL):

```
python build_dataset.py
```

**Git LFS notes** If your uploads fail with:

```
Git LFS upload failed: 14% (1/7), 4.2 MB | 0 B/s
(missing) data/train-00000-of-00001.parquet (425c88744455a9b0e7248cdd81fe4716085aae22849798f653
hint: Your push was rejected due to missing or corrupt local objects.
hint: You can disable this check with: 'git config lfs.allowincompletepush true'
```

First fetch all lfs objects:

```
git lfs fetch --all origin main
```

**Filtering script (basic)** To filter data, run the following script:

```
python scripts/filter.py subset-name 0
```

with a subset from the dataset and a start index.

---

### A.4.3 Citation

```
@misc{RewardBench,  
  title={RewardBench: Evaluating Reward Models for Language Modeling},  
  author={Lambert, Nathan and Pyatkin, Valentina and Morrison, Jacob and Miranda, LJ and Lin, H},  
  year={2024},  
  howpublished={\url{https://huggingface.co/spaces/allenai/reward-bench}}  
}
```
